# Supplementary material
Source: Royal Society of Chemistry journal article supplement (doi:10.1039/d6bm00046k)
Supplement: d6bm00046k1.pdf [file d6bm00046k1.pdf]

## Supplementary Information

### **Fibrotic-like collagen matrices as 3D in vitro models for investigating the impact of pathological extracellular matrix on skeletal muscle cell behavior**

Marie Camman <sup>1,2</sup>, Naomi Nieswic <sup>1</sup>, Maxime Mauviel <sup>1</sup>, Pierre Joanne <sup>2</sup>, Julie Brun <sup>3</sup>, Léna Villerabel <sup>1</sup>, Alba Marcellan <sup>3</sup>, Onnik Agbulut <sup>2\*</sup>, Christophe Helary <sup>1\*</sup>

<sup>1</sup> Laboratoire de la Chimie de la Matière Condensée de Paris, Sorbonne Université, CNRS, UMR 7574, Campus Pierre et Marie Curie, 4 place Jussieu, 75252 Paris Cedex 05, France.

<sup>2</sup> Institut de Biologie Paris-Seine (IBPS), Sorbonne Université, CNRS, UMR CNRS 8263, INSERM U1345, Development, Adaptation and Ageing, Campus Pierre et Marie Curie, 4 place Jussieu, 75252 Paris Cedex 05, France.

<sup>3</sup> Sciences et Ingénierie de la Matière Molle, ESPCI Paris, Université PSL, CNRS, Sorbonne Université, 10 rue Vauquelin, 75005 Paris, France.

\* Corresponding authors: Christophe H elary and Onnik Agbulut

Email address: [christophe.helary@sorbonne-universite.fr](mailto:christophe.helary@sorbonne-universite.fr) & [onnik.agbulut@sorbonne-universite.fr](mailto:onnik.agbulut@sorbonne-universite.fr)

| <b>EDC</b>                       | <b>NHS</b>                        |
|----------------------------------|-----------------------------------|
| 0 mg·mL <sup>-1</sup>            | 0 mg·mL <sup>-1</sup>             |
| 0.5 mg·mL <sup>-1</sup> (3.2 mM) | 0.12 mg·mL <sup>-1</sup> (1 mM)   |
| 1 mg·mL <sup>-1</sup> (6.4 mM)   | 0.24 mg·mL <sup>-1</sup> (1.5 mM) |
| 2 mg·mL <sup>-1</sup> (12.8 mM)  | 0.48 mg·mL <sup>-1</sup> (3.1 mM) |
| 5 mg·mL <sup>-1</sup> (32.2 mM)  | 1.2 mg·mL <sup>-1</sup> (7.7 mM)  |
| 20 mg·mL <sup>-1</sup> (129 mM)  | 4.8 mg·mL <sup>-1</sup> (30.1 mM) |

**Supplementary Information 1:** Cross-linker concentrations tested to rigidify dense collagen matrices.

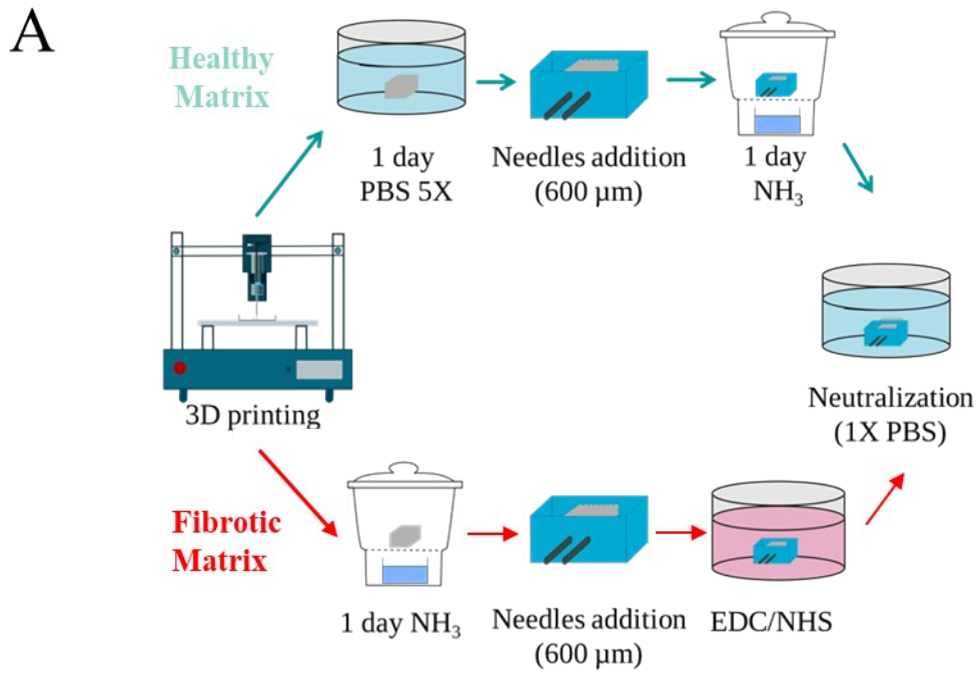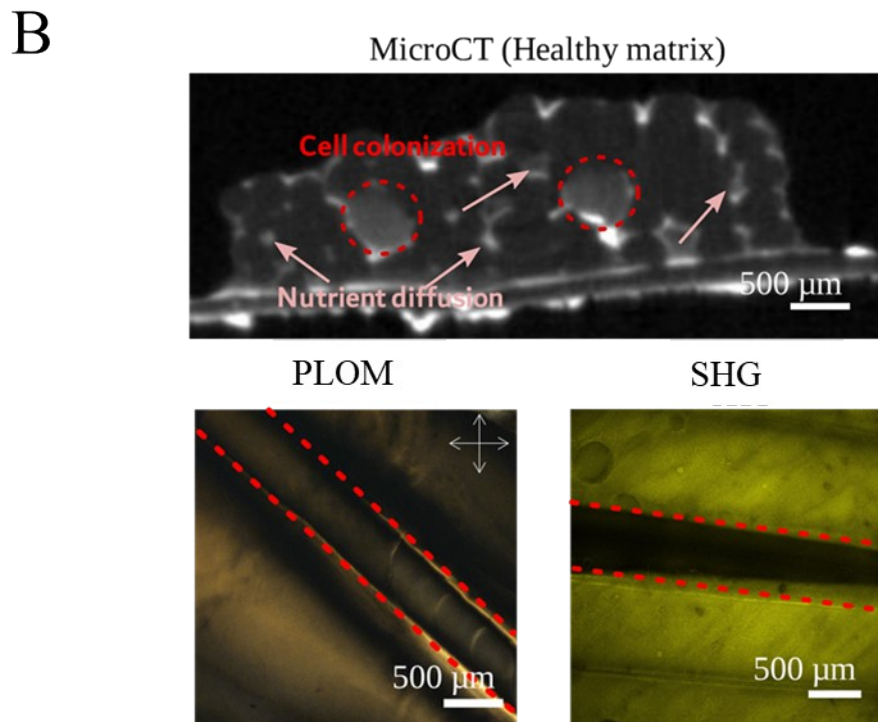

**Supplementary Information 2:** (A) Generation of macroporosity dedicated to cell colonization by introduction of needles (B) macroporosity observed by X-Ray microtomography (MicroCT), Polarized Light Microscopy (PLOM) and second harmonic generation microscopy (SHG).

A

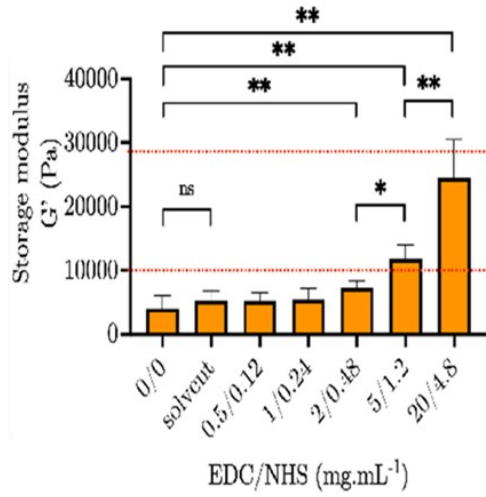

B

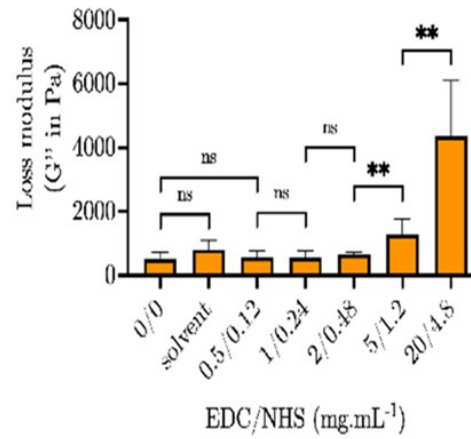

C

| Matrix          | EDC/NHS (mg.mL <sup>-1</sup> ) | tan $\delta$ |
|-----------------|--------------------------------|--------------|
| Healthy Matrix  | 0/0                            | 0.11         |
| Fibrotic Matrix | 5/1.2                          | 0.1          |

**Supplementary Information 3:** Rheological properties of casted collagen matrices after cross-linking with EDC/NHS. (A) storage modulus, (B) Loss modulus and (C) tan delta according to the EDC/NHS ratio used (n=4); \*:  $p \leq 0.05$ .

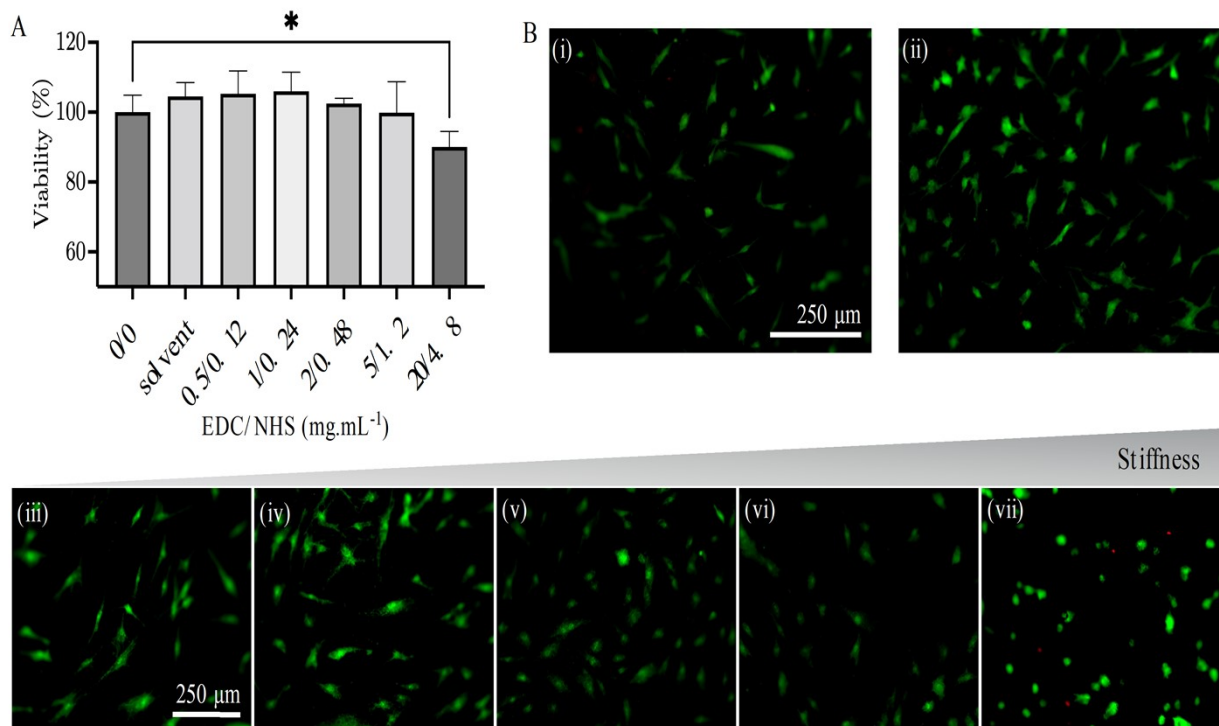

**Supplementary Information 4:** EDC/NHS cytotoxicity on normal human dermal fibroblasts. (A): Alamar blue assay (4 hours) to assess cell metabolism. (B): Live (green)/Dead (red) staining for the different concentrations of cross-linkers. Collagen hydrogel (i) without cross-linker, (ii) with Ethanol 75%, (iii) EDC/NHS=0.5/0.12 mg.mL<sup>-1</sup>, (iv) EDC/NHS=1/0.24 mg.mL<sup>-1</sup>, (v) EDC/NHS=2/0.48 mg.mL<sup>-1</sup>, (vi) EDC/NHS=5/1.2 mg.mL<sup>-1</sup>, (vii) EDC/NHS=20/4.8 mg.mL<sup>-1</sup>. \*:  $p < 0.05$ .

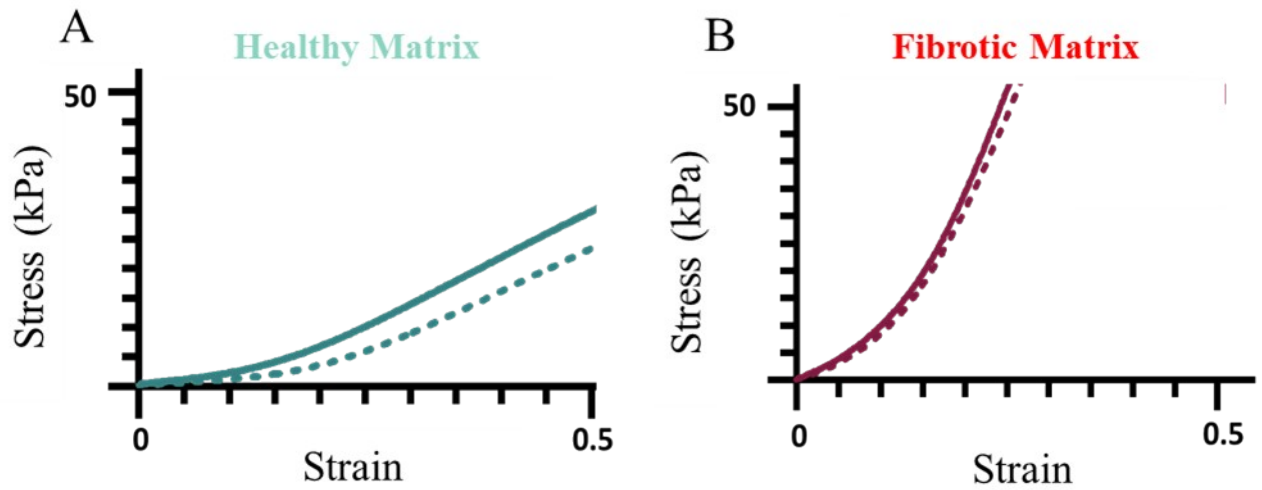

**Supplementary Information 5:** Mechanical properties of 3D printed healthy (A) and pathological matrices (B) assessed by tensile tests. Matrices were longitudinally stretched (plain lines) or perpendicularly stretched (dotted lines).

Healthy Matrix

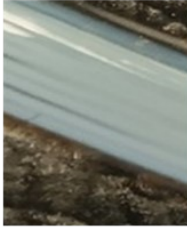

EDC/NHS Treatment  
(5/1.2 mg.mL<sup>-1</sup>)

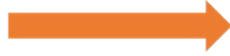

Stiff, Porous Matrix

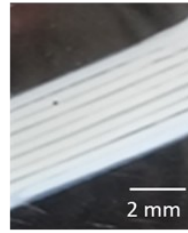

Soft, Non-Porous Matrix

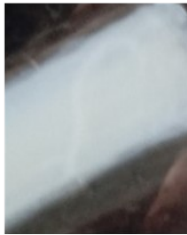

EDC/NHS Treatment  
(5/1.2 mg.mL<sup>-1</sup>)

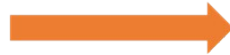

Fibrotic Matrix

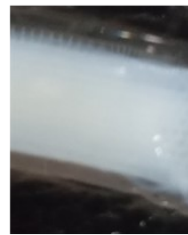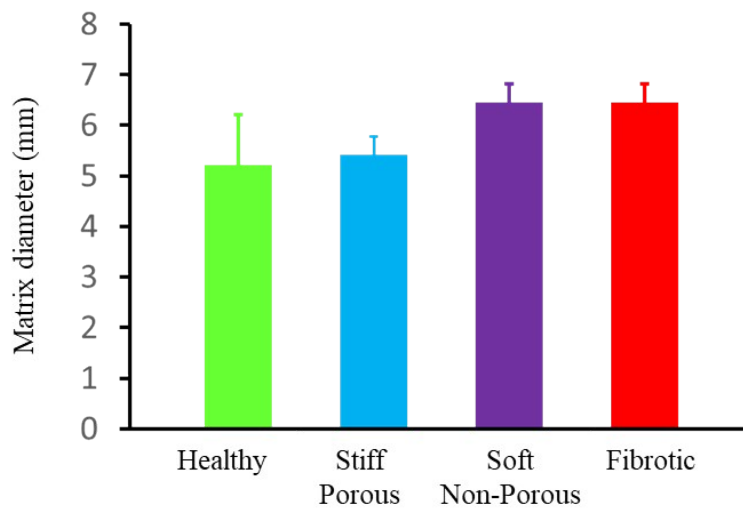

**Supplementary Information 6:** Effect of the cross-linking with EDC/NHS on the structure of 3D printed collagen matrices. Evaluation of a potential shrinking/swelling, by measure of the matrix diameter before and after cross-linking.

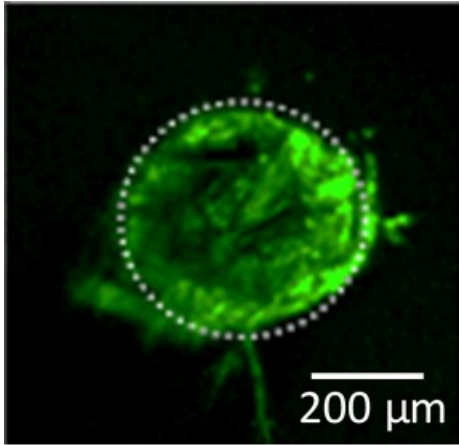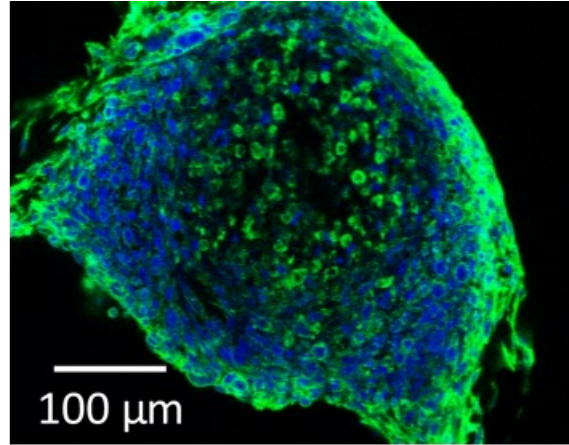

**Supplementary Information 7:** Transversal view of macropores dedicated to cell colonization after 5 days in culture. Nuclei labelled in blue (DAPI) and cytoskeleton in green (Alexa Fluor 488 Phalloidin).

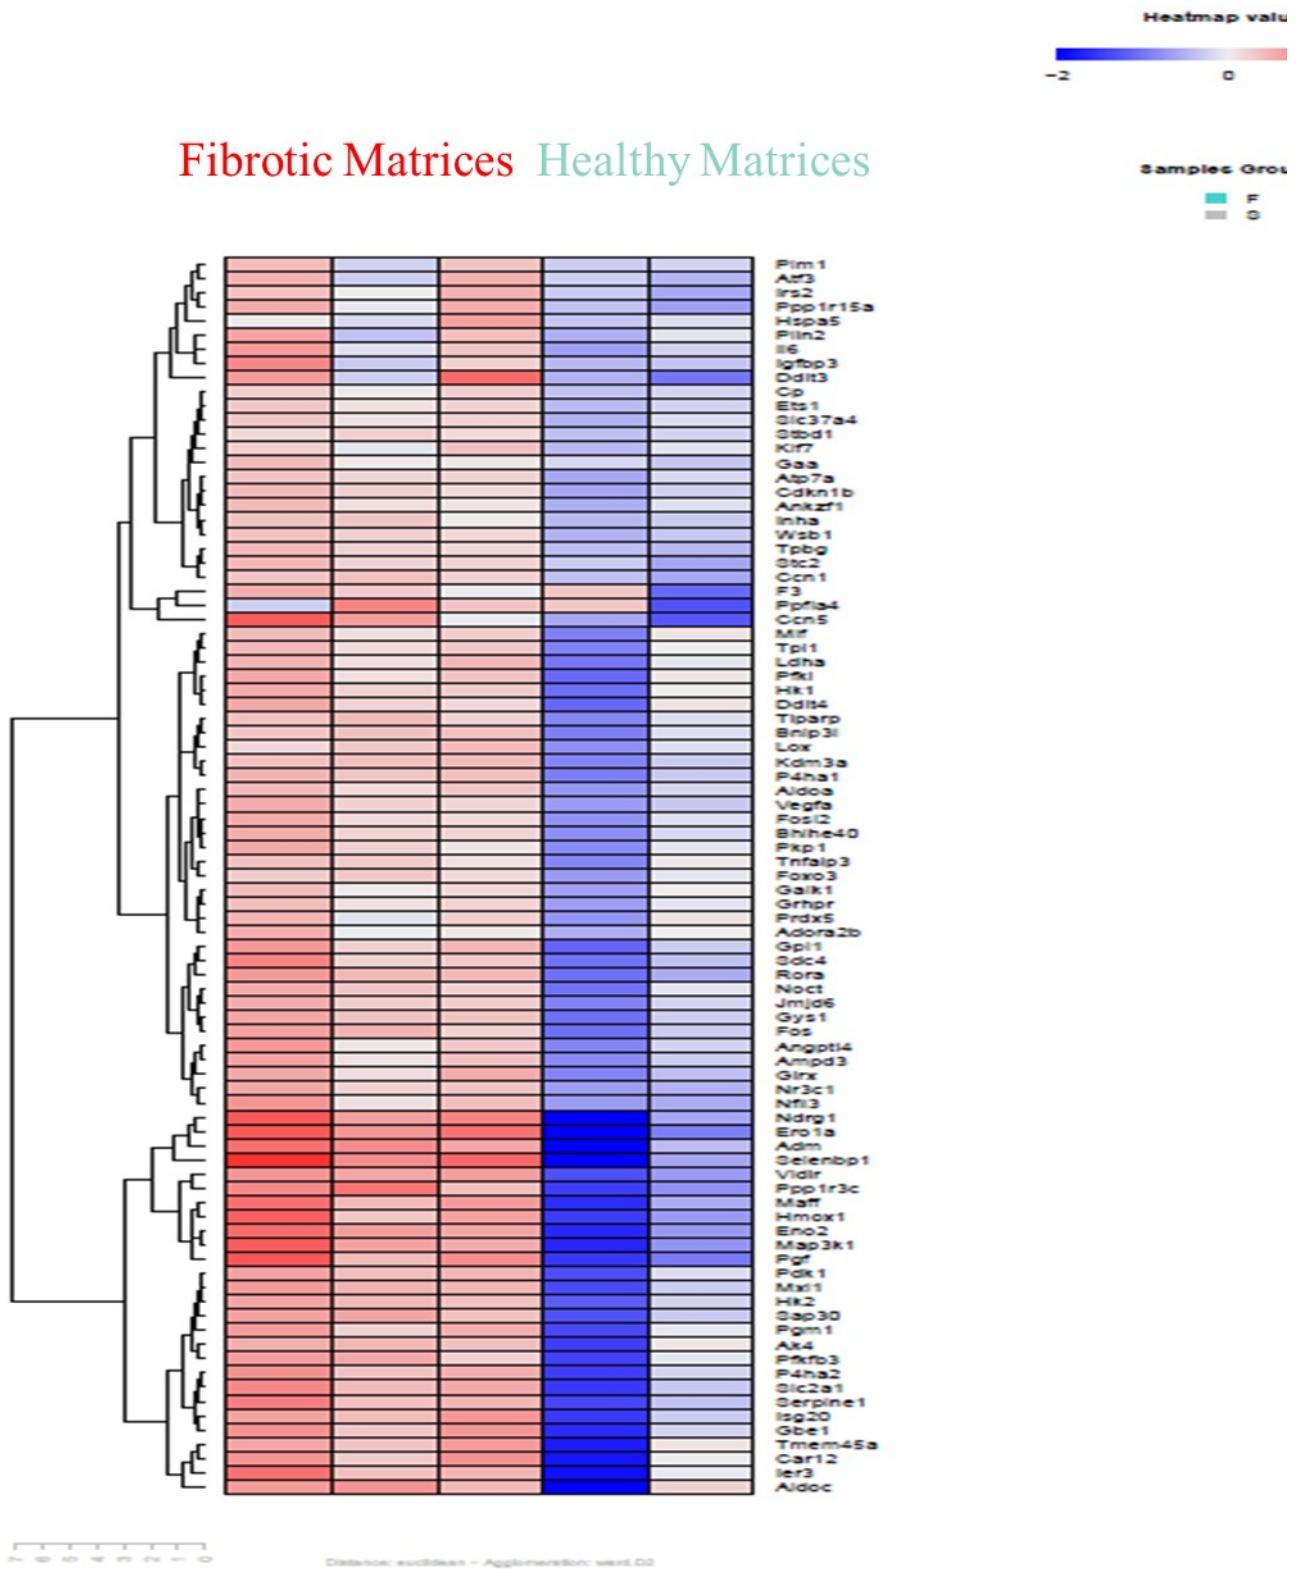

**Supporting Information 8:** Hierarchical clustering of genes in response to hypoxia. Comparison Fibrotic matrices versus healthy matrices.

## Glycolysis

| Gene Symbol | Gene Name                       | Regulation | Fold-Change |
|-------------|---------------------------------|------------|-------------|
| Hk2         | hexokinase 2                    | up         | 2.18        |
| Hk1         | hexokinase 1                    | up         | 1.75        |
| Pkm         | pyruvate kinase, muscle         | up         | 1.70        |
| Gpi1        | glucose-6-phosphate isomerase 1 | up         | 2.24        |
| Pcx         | pyruvate carboxylase            | up         | 2.21        |
| Ldha        | lactate dehydrogenase A         | up         | 1.79        |

## VEGF Signalling

| Gene Symbol | Gene Name                            | Regulation | Fold-Change |
|-------------|--------------------------------------|------------|-------------|
| Vegfd       | vascular endothelial growth factor D | up         | 3.72        |
| Vegfa       | vascular endothelial growth factor A | up         | 1.79        |
| Vegfb       | vascular endothelial growth factor B | up         | 1.66        |

## ROS metabolic process

| Gene Symbol | Gene Name                             | Regulation | Fold-Change |
|-------------|---------------------------------------|------------|-------------|
| Gpx3        | glutathione peroxidase 3              | up         | 5.04        |
| Gstp1       | glutathione S-transferase, pi 1       | up         | 1.73        |
| Nos2        | nitric oxide synthase 2, inducible    | up         | 2.81        |
| Sod2        | superoxide dismutase 2, mitochondrial | up         | 1.81        |
| Nox4        | NADPH oxidase 4                       | up         | 1.70        |

**Supporting Information 9:** Comparison fibrotic matrices vs healthy matrices. Regulation of genes involved in glycolysis, VEGF signaling and ROS metabolic process.

**A**

### Inflammation

| Link to Pathway          | Pathway Description    | Nb Genes in Pathway | Nb Regulated Genes (Up / Down) | P-Value (All) |
|--------------------------|------------------------|---------------------|--------------------------------|---------------|
| <a href="#">mmu04668</a> | TNF signaling pathway  | 110                 | 24 (16/8)                      | 2,21E-07      |
| <a href="#">WP387</a>    | IL-6 signaling Pathway | 99                  | 11 (9/2)                       | 6,75E-02      |
| <a href="#">WP37</a>     | IL-1 Signaling Pathway | 37                  | 6 (6/0)                        | 3,50E-02      |

**Supplementary Information 10:** Pathways analysis of genes involved in inflammation.

A

## ECM-Receptor Interactions

| Gene symbol | Gene name                                     | Regulation | Fold change |
|-------------|-----------------------------------------------|------------|-------------|
| Agrr        | agrin                                         | down       | 1,75        |
| Cd44        | CD44 antigen                                  | down       | 1,65        |
| Col4a1      | collagen, type IV, alpha 1                    | down       | 1,94        |
| Col4a2      | collagen, type IV, alpha 2                    | down       | 2,05        |
| Col4a5      | collagen, type IV, alpha 5                    | down       | 1,97        |
| Col6a1      | collagen, type VI, alpha 1                    | down       | 1,80        |
| Col6a2      | collagen, type VI, alpha 2                    | down       | 2,04        |
| Col6a3      | collagen, type VI, alpha 3                    | down       | 2,10        |
| Hmrr        | hyaluronan mediated motility receptor (RHAMM) | down       | 8,10        |
| Itgb3       | integrin beta 3                               | down       | 1,71        |
| Itgb7       | integrin beta 7                               | up         | 1,89        |
| Spp1        | secreted phosphoprotein 1                     | down       | 1,53        |
| Sdc4        | syndecan 4                                    | up         | 2,28        |
| Itga10      | integrin, alpha 10                            | down       | 4,77        |
| Thbs2       | thrombospondin 2                              | down       | 1,65        |
| Thbs3       | thrombospondin 3                              | down       | 2,31        |
| Tnc         | tenascin C                                    | down       | 4,61        |
| Cdh15       | cadherin 15                                   | down       | 1,53        |
| Has1        | hyaluronan synthase 1                         | down       | 2,14        |
| Has2        | hyaluronan synthase 2                         | down       | 1,90        |

B

## Metalloproteinases

| Gene symbol | Gene name                                       | Regulation | Fold change |
|-------------|-------------------------------------------------|------------|-------------|
| Mmp9        | matrix metalloproteinase 9                      | down       | 5,86        |
| Mmp14       | matrix metalloproteinase 14 (membrane-inserted) | down       | 1,55        |
| Timp1       | tissue inhibitor of metalloproteinase 1         | down       | 1,80        |
| Mmp16       | matrix metalloproteinase 16                     | up         | 2,73        |

C

## Collagen maturation and Crosslinking

| Gene symbol | Gene name                                                                                       | Regulation | Fold change |
|-------------|-------------------------------------------------------------------------------------------------|------------|-------------|
| Plod1       | procollagen-lysine, 2-oxoglutarate 5-dioxygenase 1                                              | up         | 2,20        |
| Plod2       | procollagen lysine, 2-oxoglutarate 5-dioxygenase 2                                              | up         | 2,02        |
| P4ha1       | procollagen-proline, 2-oxoglutarate 4-dioxygenase (proline 4-hydroxylase), alpha 1 polypeptide  | up         | 2,05        |
| P4ha2       | procollagen-proline, 2-oxoglutarate 4-dioxygenase (proline 4-hydroxylase), alpha II polypeptide | up         | 2,44        |
| P4hb        | prolyl 4-hydroxylase, beta polypeptide                                                          | up         | 2,74        |
| Serpine1    | serine (or cysteine) peptidase inhibitor, clade E, member 1                                     | up         | 2,69        |
| Lox4        | lysyl oxidase-like 4                                                                            | up         | 1,82        |
| Lox         | lysyl oxidase                                                                                   | up         | 1,69        |

**Supplementary Information 11:** Modulation of genes involved in ECM synthesis, maturation and remodeling. (A) Genes involved in cell/ECM interactions, (B) Metalloproteinases and (C) collagen maturation and cross-linking.

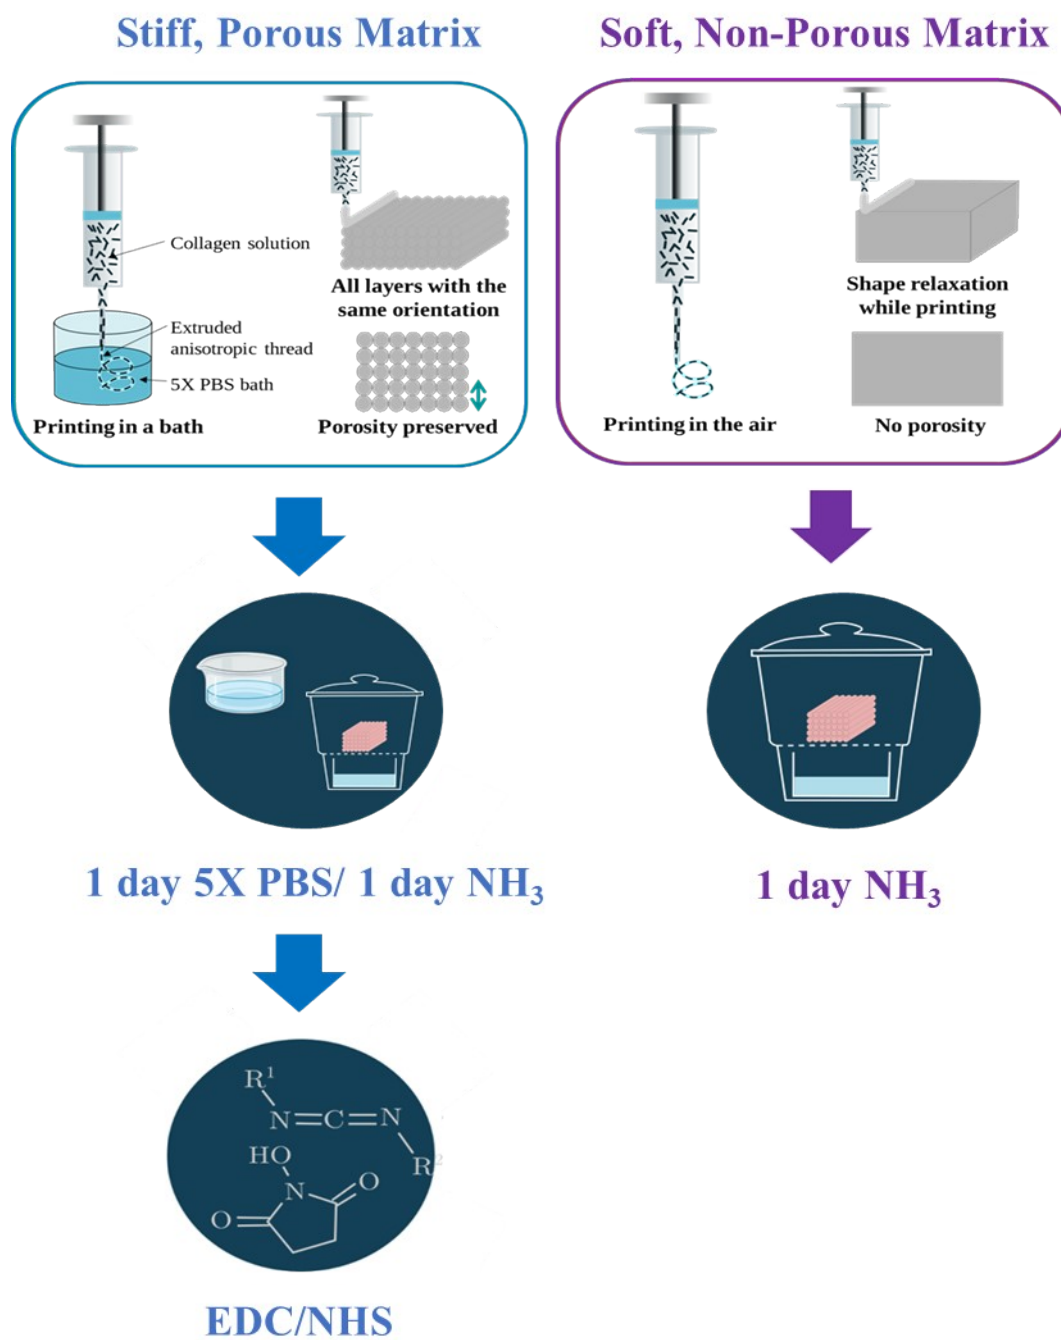

**Supplementary Information 12:** Fabrication of stiff, porous and soft, non-porous matrices by 3D printing. Stiff, porous matrices were printed in 5X PBS, gelled in 5X PBS for one day and in ammonia vapors for another day. After several rinses to decrease the pH down to 7, matrices were cross-linked using EDC/NHS. Soft, non-porous matrices were printed in air and gelled in ammonia vapors for one day.

## Pathways

| Link to REACTOME Pathway      | Pathway Description (REACTOME)                        | Nb Genes in Pathway | Nb Regulated Genes (Up / Down) | P-Value (All) |
|-------------------------------|-------------------------------------------------------|---------------------|--------------------------------|---------------|
| <a href="#">R-MMU-1592389</a> | Activation of Matrix Metalloproteinases               | 36                  | 6 (1/5)                        | 1,04E-03      |
| <a href="#">R-MMU-8948216</a> | Collagen chain trimerization                          | 43                  | 11 (7/4)                       | 9,97E-08      |
| <a href="#">R-MMU-1442490</a> | Collagen degradation                                  | 68                  | 13 (7/6)                       | 2,81E-07      |
| <a href="#">R-MMU-1650814</a> | Collagen biosynthesis and modifying enzymes           | 66                  | 14 (10/4)                      | 2,44E-08      |
| <a href="#">R-MMU-2022090</a> | Assembly of collagen fibrils and other multimeric str | 70                  | 16 (10/6)                      | 7,56E-10      |
| <a href="#">R-MMU-1474290</a> | Collagen formation                                    | 98                  | 20 (13/7)                      | 5,22E-11      |

### Matrix metallopeptidases

| Pathway                           | Gene Symbol | Gene Name                  | Regulation | Fold Change | Statistic |
|-----------------------------------|-------------|----------------------------|------------|-------------|-----------|
| Extracellular matrix organization | Mmp11       | matrix metallopeptidase 11 | down       | 1,88        | 1,28E-04  |
| Extracellular matrix organization | Mmp13       | matrix metallopeptidase 13 | down       | 4,56        | 3,49E-03  |
| Extracellular matrix organization | Mmp2        | matrix metallopeptidase 2  | down       | 1,59        | 1,52E-02  |
| Extracellular matrix organization | Mmp9        | matrix metallopeptidase 9  | down       | 3,41        | 1,80E-05  |

### Adhesion Receptors

| Pathway                           | Gene Symbol | Gene Name          | Regulation | Fold Change | Statistic |
|-----------------------------------|-------------|--------------------|------------|-------------|-----------|
| Extracellular matrix organization | Itga11      | integrin alpha 11  | up         | 1,87        | 1,83E-03  |
| Extracellular matrix organization | Sdc1        | syndecan 1         | down       | 1,63        | 2,90E-05  |
| Extracellular matrix organization | Itga10      | integrin, alpha 10 | down       | 3,60        | 6,88E-06  |

### Collagens

| Pathway                           | Gene Symbol | Gene Name                     | Regulation | Fold Change | Statistic |
|-----------------------------------|-------------|-------------------------------|------------|-------------|-----------|
| Extracellular matrix organization | Col18a1     | collagen, type XVIII, alpha 1 | up         | 1,57        | 8,63E-03  |
| Extracellular matrix organization | Col5a1      | collagen, type V, alpha 1     | up         | 1,55        | 2,02E-02  |
| Extracellular matrix organization | Col8a1      | collagen, type VIII, alpha 1  | up         | 2,51        | 2,03E-16  |
| Extracellular matrix organization | Col1a1      | collagen, type I, alpha 1     | up         | 1,97        | 7,58E-04  |
| Extracellular matrix organization | Col1a2      | collagen, type I, alpha 2     | up         | 1,77        | 1,96E-05  |

### Collagen crosslinking

| Pathway            | Gene Symbol | Gene Name                            | Regulation | Fold Change | Statistic |
|--------------------|-------------|--------------------------------------|------------|-------------|-----------|
| Collagen formation | Lox         | lysyl oxidase                        | up         | 1,70        | 3,49E-02  |
| Collagen formation | Lox4        | lysyl oxidase-like 4                 | up         | 1,71        | 2,23E-02  |
| Collagen formation | Pcolce2     | procollagen C-endopeptidase enhancer | up         | 1,70        | 8,62E-03  |

### ECM polymers

| Pathway                              | Gene Symbol | Gene Name             | Regulation | Fold Change | Statistic |
|--------------------------------------|-------------|-----------------------|------------|-------------|-----------|
| Degradation of the ECM               | Dcn         | decorin               | down       | 2,94        | 1,35E-10  |
| Laminin interactions                 | Lama1       | laminin, alpha 1      | up         | 3,40        | 5,27E-07  |
| Laminin interactions                 | Lamb3       | laminin, beta 3       | up         | 1,84        | 1,31E-02  |
| extracellular structure organization | Has1        | hyaluronan synthase 1 | down       | 1,81        | 2,95E-05  |

**Supplementary Information 13:** Comparison stiff porous matrices vs healthy matrices. List of relevant pathways regulated (Reactome Analysis).

## Pathways

| Link to REACTOME or GO Pathway | Pathway Description                | Nb Genes in Pathway | Nb Regulated Genes (Up / Down) | P-Value (All) |
|--------------------------------|------------------------------------|---------------------|--------------------------------|---------------|
| <a href="#">GO:0140253</a>     | cell-cell fusion                   | 59                  | 4 (0/4)                        | 5,95E-02      |
| <a href="#">R-MMU-1474244</a>  | Extracellular matrix organization  | 283                 | 19 (7/12)                      | 9,84E-05      |
| <a href="#">R-MMU-1442490</a>  | Collagen degradation               | 68                  | 8 (1/7)                        | 2,83E-04      |
| <a href="#">R-MMU-8948216</a>  | Collagen chain trimerization       | 43                  | 7 (1/6)                        | 8,55E-05      |
| <a href="#">R-MMU-1474290</a>  | Collagen formation                 | 98                  | 10 (3/7)                       | 1,68E-04      |
| <a href="#">R-MMU-216083</a>   | Integrin cell surface interactions | 77                  | 7 (2/5)                        | 3,08E-03      |
| <a href="#">GO:0001525</a>     | angiogenesis                       | 488                 | 23 (15/8)                      | 2,85E-03      |
| <a href="#">GO:0031012</a>     | extracellular matrix               | 441                 | 28 (8/20)                      | 6,86E-06      |

## List of genes

| Pathway                           | Gene Symbol | Gene Name                         | Regulation | Fold Change | Statistic |
|-----------------------------------|-------------|-----------------------------------|------------|-------------|-----------|
| Extracellular matrix organization | Emilin1     | elastin microfibril interfacier 1 | down       | 1,57        | 4,43E-03  |
| Extracellular matrix organization | Col13a1     | collagen, type XIII, alpha 1      | down       | 2,23        | 7,16E-03  |
| Extracellular matrix organization | Col15a1     | collagen, type XV, alpha 1        | down       | 3,16        | 1,58E-03  |
| Extracellular matrix organization | Col18a1     | collagen, type XVIII, alpha 1     | up         | 1,55        | 1,67E-02  |
| Extracellular matrix organization | Col6a1      | collagen, type VI, alpha 1        | down       | 1,87        | 2,73E-03  |
| Extracellular matrix organization | Col6a2      | collagen, type VI, alpha 2        | down       | 1,89        | 1,04E-02  |
| Extracellular matrix organization | Itga4       | integrin alpha 4                  | down       | 1,80        | 2,54E-02  |

**Supplementary Information 14:** Comparison soft non-porous matrices vs healthy matrices. List of relevant pathways regulated (Reactome or GO Analysis).
